# Supplementary material for: Sedentary behavior patterns and adiposity in children: a study based on compositional data analysis
Source: Springer Nature journal article supplement (doi:10.1186/s12887-020-02036-6), 2020-04-02

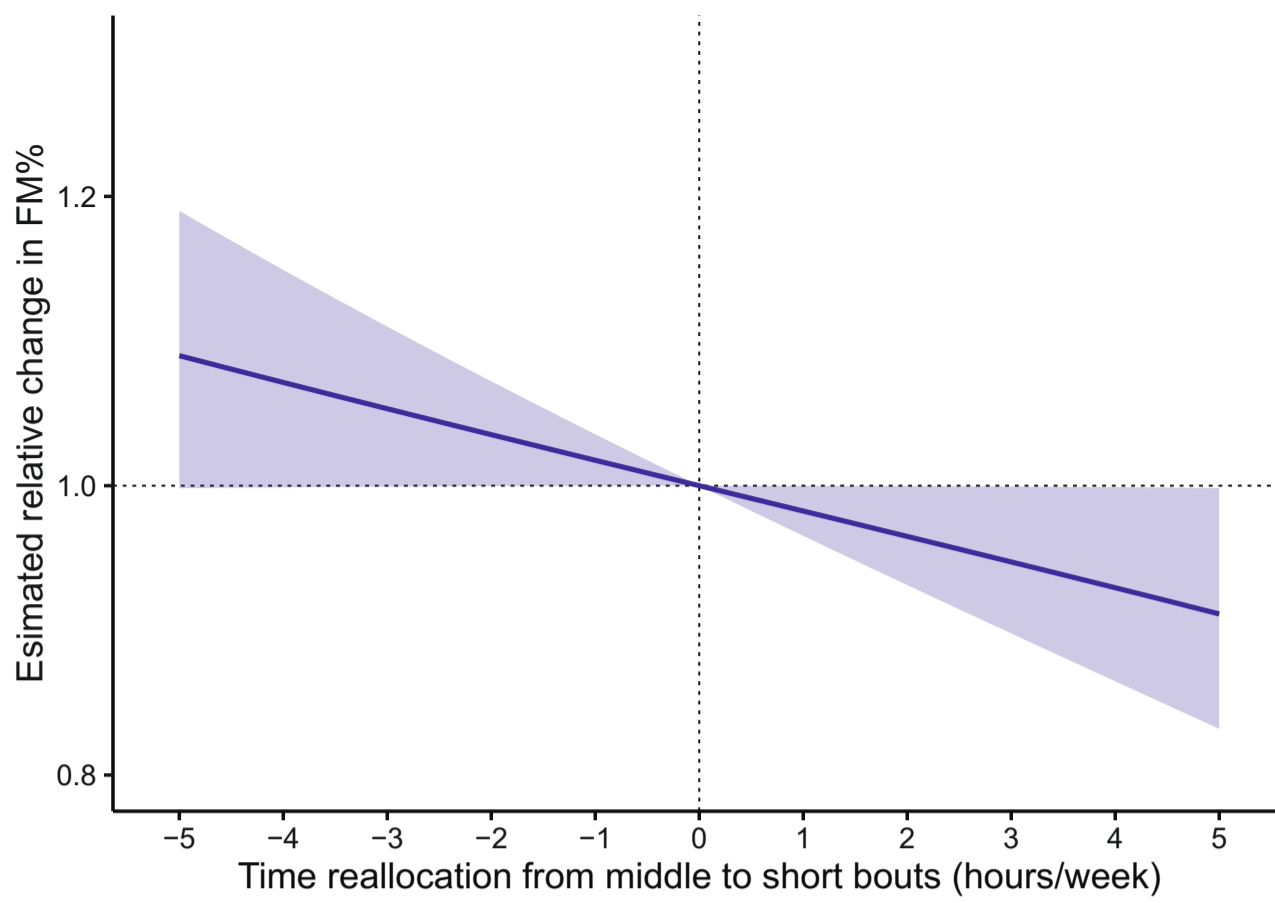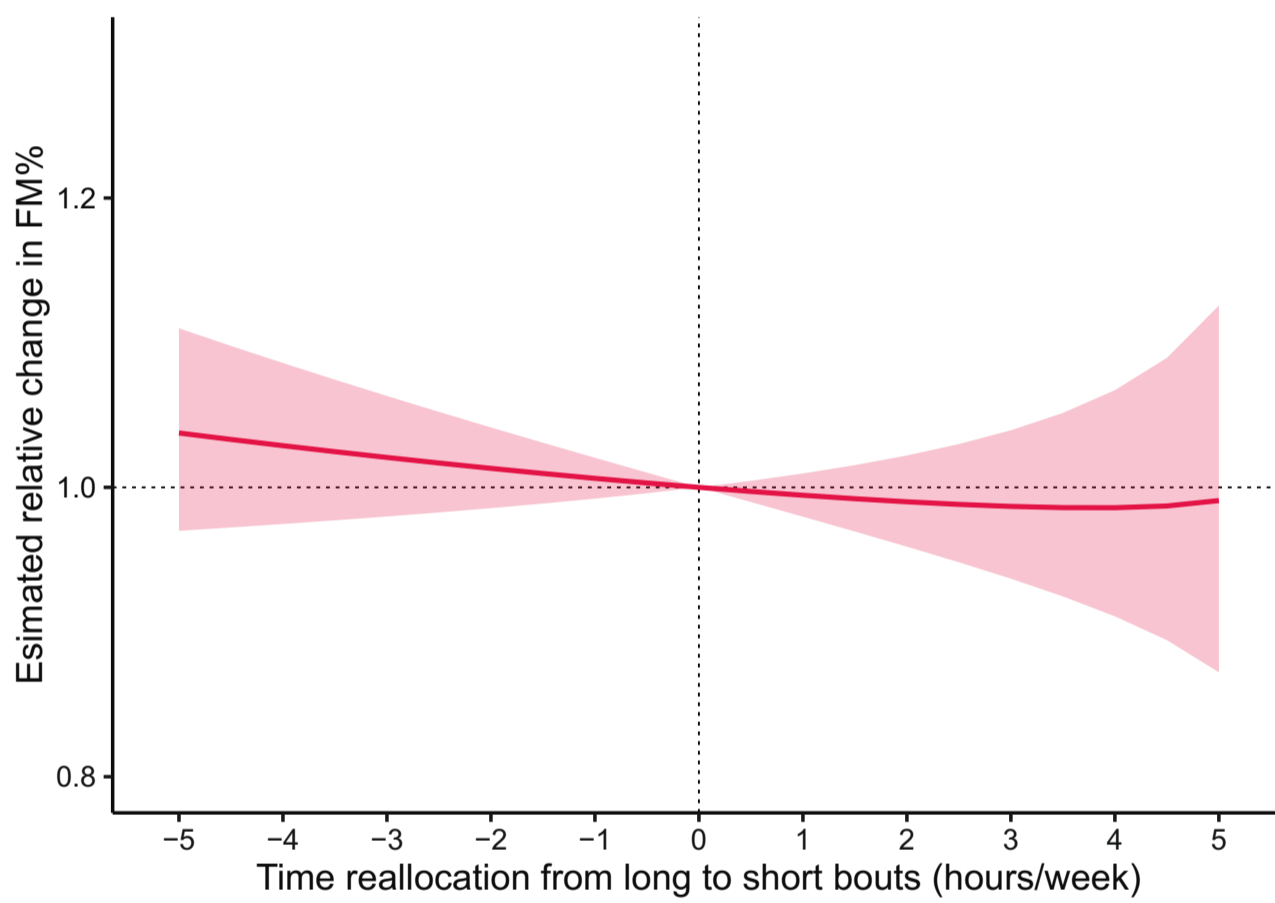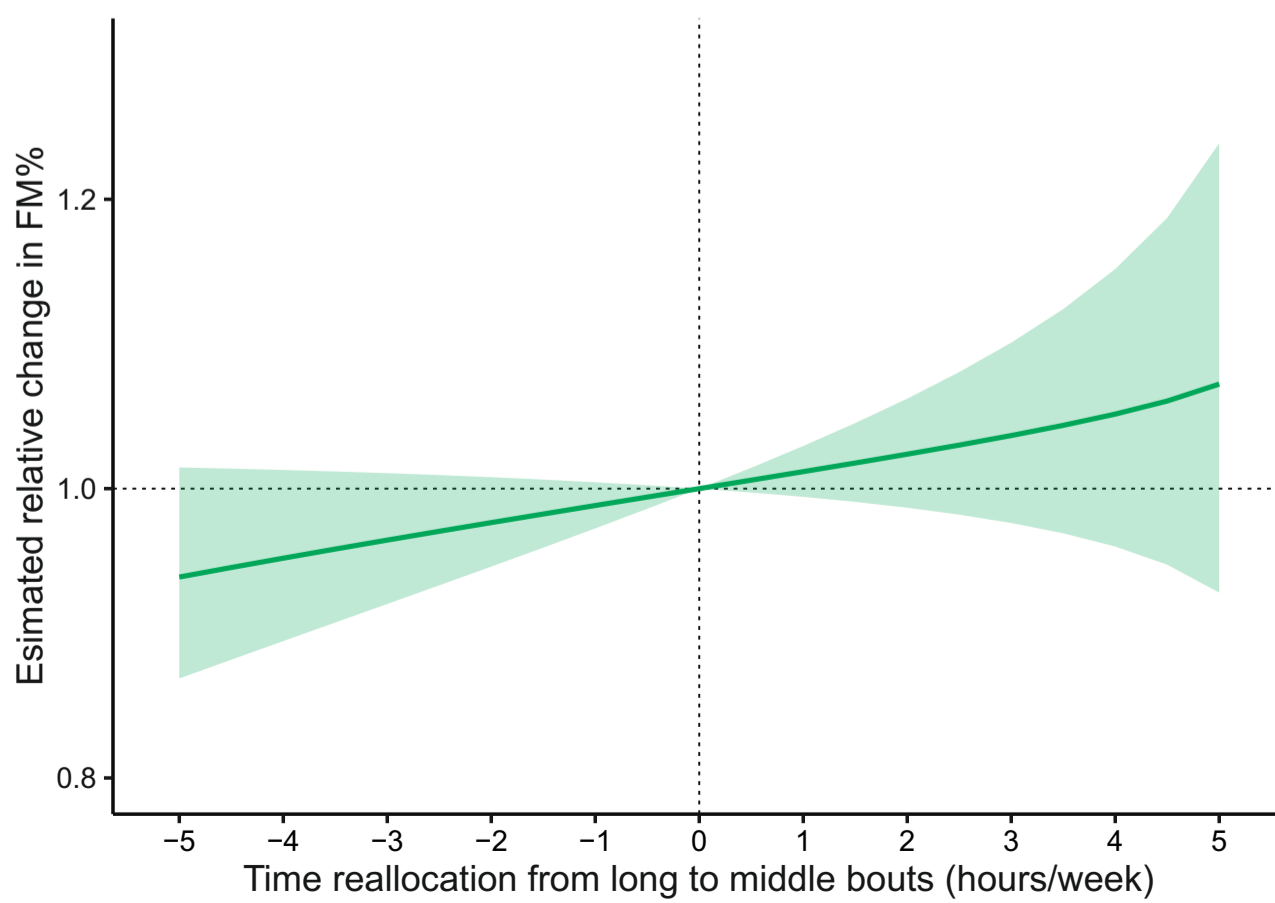

Supplement: MOESM2 [file 17860348]
